# Supplementary material for: Spatial–Temporal Distribution of Phosphorus Fractions and Their Relationship in Water–Sediment Phases in the Tuojiang River, China
Source: MDPI journal article supplement (doi:10.3390/w14010027), 2021-12-23
Supplement: s1 [file s1]

## Supplementary Materials for

### **Spatial-temporal distribution of phosphorus fractions and their relationship in water-sediment phases in the Tuojiang River, China**

**Dandan Liu<sup>1,2,3</sup>, Xueying Li<sup>1,2</sup>, Yue Zhang<sup>1,2</sup>, Zhibo Lu<sup>3</sup>, Lu Bai<sup>1,2,\*</sup>, Qi Qiao<sup>1,2,3\*</sup> and Jingyang Liu<sup>1,2</sup>**

<sup>1</sup> State Key Laboratory of Environmental Criteria and Risk Assessment, Chinese Research Academy of Environmental Sciences, Beijing, 100012, China

<sup>2</sup> SEPA Key Laboratory of Eco-Industry, Chinese Research Academy of Environmental Sciences, Beijing, 100012, China

<sup>3</sup> State Key Laboratory of Pollution Control and Resource Reuse, College of Environmental Science and Engineering, Tongji University, Shanghai, 200092, China

\*Correspondence: bailu@craes.org.cn (L.B.); qiaoqi@craes.org.cn (Q.Q.); Tel.: +86-10-84919337

(L.B.) +86-10-84915107 (Q.Q.)

## **Introduction**

This PDF contains information about the sampling sites in the Tuojiang River.

**Table S1.** Sampling sites in the Tuojiang River.

| Sites | Longitude (°E) | Latitude (°N) | Water depth (m) |            |
|-------|----------------|---------------|-----------------|------------|
|       |                |               | Wet season      | Dry season |
| S1    | 104.11         | 31.57         | 0.2             | 0.2        |
| S2    | 104.26         | 31.19         | 0.8             | 0.7        |
| S3    | 104.40         | 31.06         | 2.5             | 2.1        |
| S4    | 104.37         | 30.97         | 1.2             | 1.0        |
| S5    | 104.36         | 30.92         | 1.2             | 1.1        |
| S6    | 104.38         | 30.90         | 1.0             | 0.9        |
| S7    | 104.39         | 30.86         | 0.6             | 0.5        |
| S8    | 104.50         | 30.76         | 1.2             | 0.8        |
| S9    | 104.53         | 30.60         | 2.8             | 2.7        |
| S10   | 104.77         | 30.48         | 2.0             | 1.5        |
| S11   | 104.54         | 30.41         | 0.7             | 0.7        |
| S12   | 104.70         | 30.16         | 3.8             | 3.5        |
| S13   | 104.66         | 30.10         | 4.1             | 3.8        |
| S14   | 104.68         | 30.06         | 3.2             | 3.1        |
| S15   | 104.66         | 29.99         | 0.4             | 0.3        |
| S16   | 104.44         | 30.00         | 0.5             | 0.3        |
| S17   | 104.65         | 29.96         | 4.3             | 2.8        |
| S18   | 104.97         | 29.68         | 3.2             | 2.0        |
| S19   | 105.08         | 29.58         | 2.0             | 1.8        |
| S20   | 105.02         | 29.46         | 0.8             | 0.5        |
| S21   | 104.74         | 29.36         | 4.3             | 2.1        |
| S22   | 104.82         | 29.34         | 4.0             | 2.0        |
| S23   | 104.95         | 29.14         | 7.4             | 3.3        |
| S24   | 104.96         | 29.14         | 5.7             | 3.5        |
| S25   | 105.22         | 29.00         | 2.8             | 1.9        |
| S26   | 105.26         | 28.97         | 0.6             | 0.6        |
| S27   | 105.34         | 29.01         | 1.8             | 1.1        |
| S28   | 105.36         | 28.95         | 0.7             | 0.5        |
| S29   | 105.43         | 28.88         | 4.2             | 2.3        |
